# Supplementary material
Source: PubMed Central journal article supplement (PMC5622227)
Supplement: ajcr0007-1937-f4.pdf [file ajcr0007-1937-f4.pdf]

A missense variant in SLC2A4RG associated with glioblastoma risk

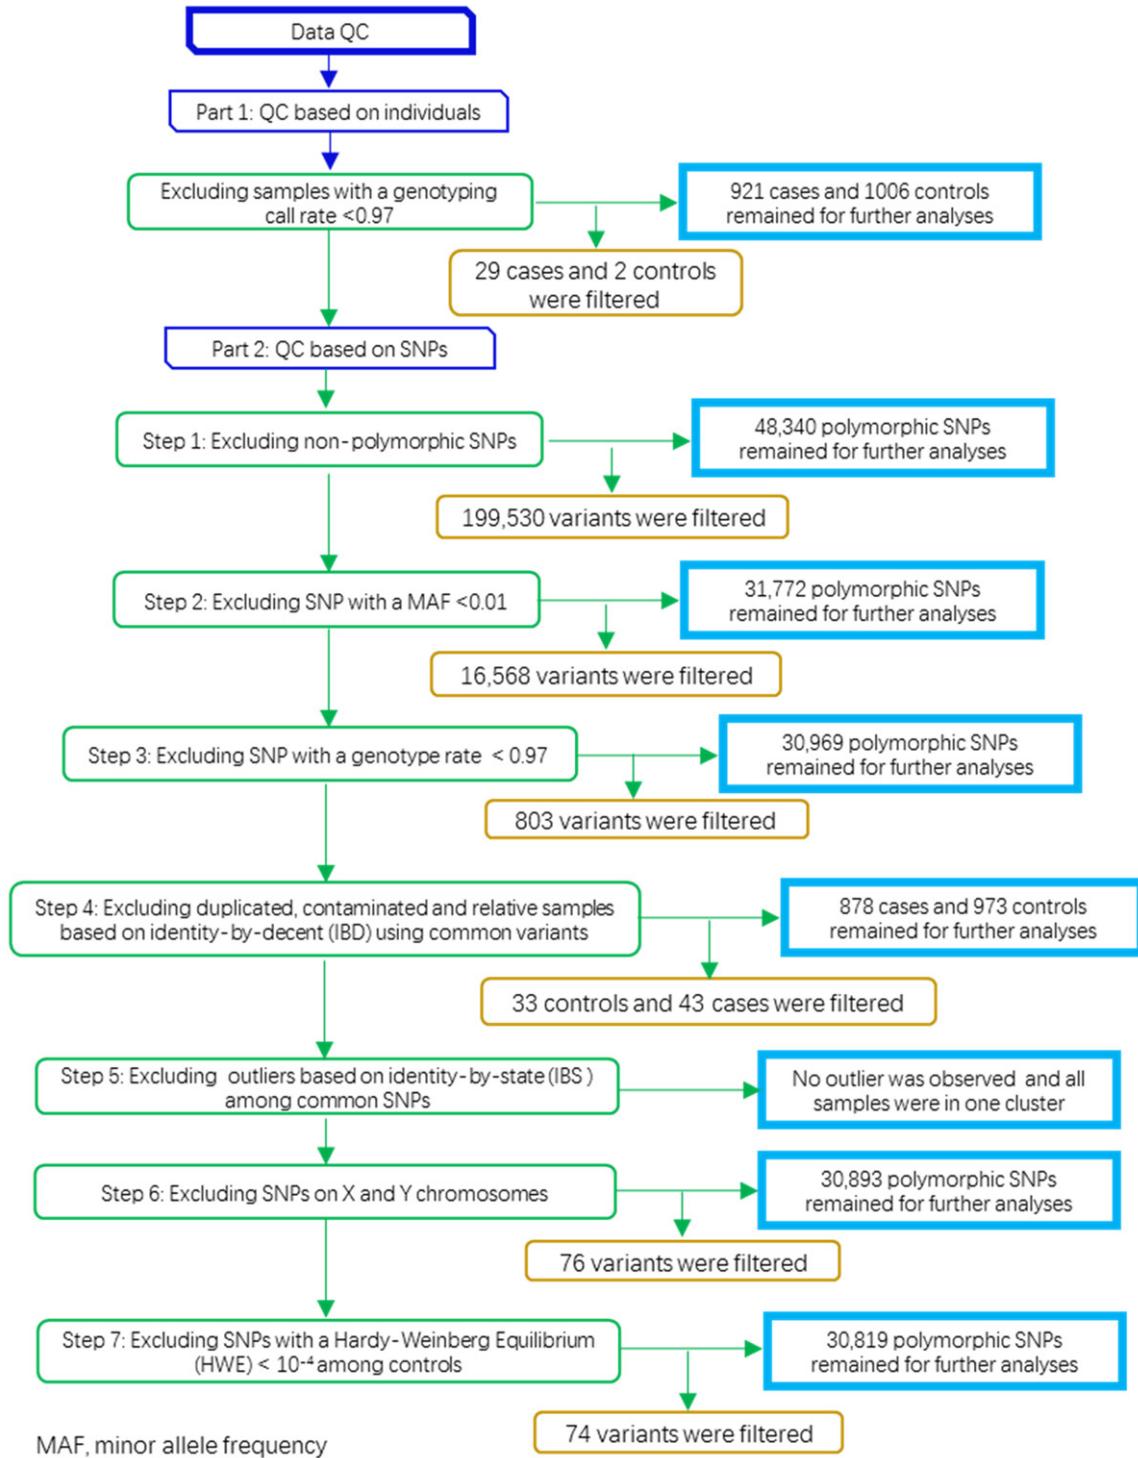

**Supplementary Figure 1.** Flowchart of data quality control (QC) steps in the exome-wide association analysis. The flowchart shows the steps used to filter study subjects and variants based on variants genotyped by Illumina HumanExome Beadchip v1.0.

A missense variant in SLC2A4RG associated with glioblastoma risk

**Supplementary Table 1.** Power for detecting associations in 1,000 cases vs 1,000 controls,  $P = 10E-06$

| MAF  | OR   |      |       |       |       |       |
|------|------|------|-------|-------|-------|-------|
|      | 2.0  | 2.4  | 2.8   | 3.2   | 3.6   | 4.0   |
| 0.01 | 0.01 | 0.07 | 0.23  | 0.48  | 0.72  | 0.88  |
| 0.02 | 0.10 | 0.45 | 0.82  | 0.97  | >0.99 | >0.99 |
| 0.03 | 0.31 | 0.81 | 0.98  | >0.99 | >0.99 | >0.99 |
| 0.04 | 0.55 | 0.95 | >0.99 | >0.99 | >0.99 | >0.99 |
| 0.05 | 0.74 | 0.99 | >0.99 | >0.99 | >0.99 | >0.99 |

**Supplementary Table 2.** Constitutions of SNP passing QC according to their genomic contexts

| SNP Type                  | Number | Percentage |
|---------------------------|--------|------------|
| Missense                  | 15,467 | 50.19      |
| Intergenic                | 7,585  | 24.61      |
| Intron                    | 5,382  | 17.46      |
| Silent                    | 1,042  | 3.38       |
| Coding                    | 383    | 1.24       |
| 3'UTR                     | 379    | 1.23       |
| Non_coding_exon           | 140    | 0.45       |
| 5'UTR                     | 125    | 0.41       |
| Nonsense                  | 121    | 0.39       |
| Splicing                  | 94     | 0.31       |
| Missing data              | 92     | 0.30       |
| Upstream gene variant     | 4      | 0.01       |
| Downstream gene variant   | 2      | 0.01       |
| 5 prime UTR variant       | 1      | 0.00       |
| Regulatory region variant | 1      | 0.00       |
| Synonymous variant        | 1      | 0.00       |
| Total                     | 30,819 | 100.00     |

## A missense variant in SLC2A4RG associated with glioblastoma risk

**Supplementary Table 3.** Sequences of primers and oligonucleotides used for real-time PCR and plasmid construction

| Primer name                      | Sense (5'-3')                            | Antisense (5'-3')                       |
|----------------------------------|------------------------------------------|-----------------------------------------|
| Primers for real-time PCR        |                                          |                                         |
| CDK2-qPCR                        | CATTCTCTTCCCCTCATCA                      | TTTAAGGTCTCGGTGGAGGA                    |
| CDK6-qPCR                        | GAAGTAGGCAAAGACTACTTCTGA                 | GGTGGGAATCCAGGTTTTCT                    |
| E2F1-qPCR                        | TCTATGACATCACCAACGTCCT                   | CTGGGTCAACCCCTCAAG                      |
| Myc-qPCR                         | CACCAGCAGCGACTCTGA                       | GATCCAGACTCTGACCTTTTGC                  |
| Actin-qPCR                       | AGGCACCAGGGCGTGAT                        | GCCACATAGGAATCCTCTGAC                   |
| Primers for plasmid construction |                                          |                                         |
| SLC2A4RG-rs8957-T-overlap        | GGGAGGCAGGCAGGCCTGATCAGAGTGATGGTGAGGAGGA | TCCTCCTACCATCACTCTGATCAGGCTCGCCTGCCTCCC |
| SLC2A4RG-N2-EGFP-OV              | CCGCTCGAGGAGTCAGCCCTCGCCGCTGCA           | CCGGAATTCGTCCAGGAACCGCTGGCAGGCT         |

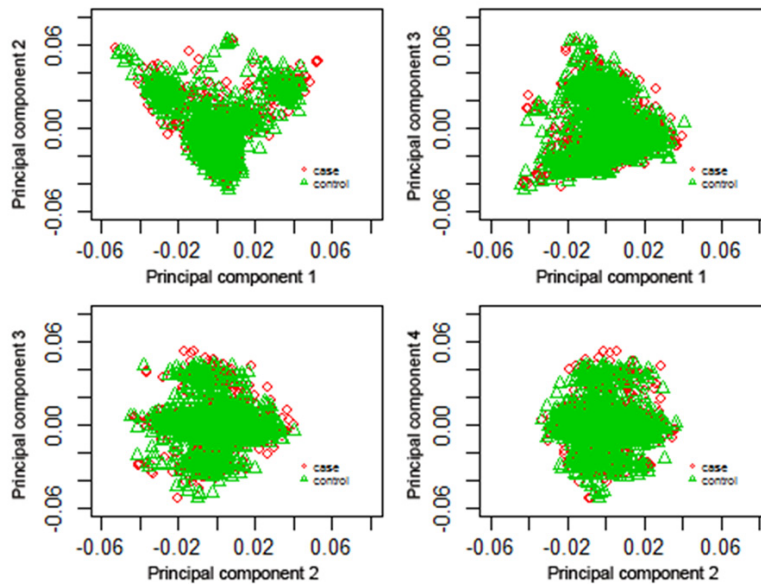

**Supplementary Figure 2.** Pairwise MDS (multi-dimensional scaling) plot of the first 4 principal components.

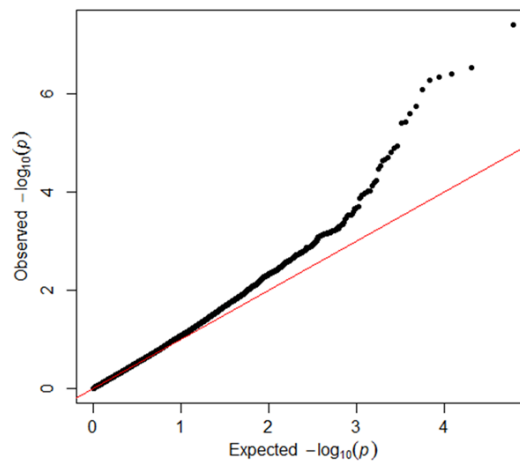

**Supplementary Figure 3.** Quantile-Quantile (Q-Q) plot of observed versus expected  $P$  values in GBM exome chip-wide association analyses. The analysis was adjusted by the first 4 principal components. The genomic control lambda is 1.044.
